# Supplementary material
Source: publisher figshare collection journal article supplement (https://asha.figshare.com/articles/dataset/_/24091860)
Supplement: Supplementary file 1 [file 1]

## Supplemental Material S5. Abbreviation definitions.

| Abbreviation | Definition                                              |
|--------------|---------------------------------------------------------|
| [cs]         | Code used for complex syntax                            |
| [err]        | Code used for complex syntax errors                     |
| [FPC]        | Code used for full propositional clauses                |
| [WFC]        | Code used for <i>wh</i> - finite clausal complements    |
| [WNFC]       | Code used for <i>wh</i> - nonfinite clausal complements |
| ANOVA        | Analysis of variance                                    |
| CI           | Cochlear implant                                        |
| CTH          | Children with typical hearing                           |
| DHH          | Children who are deaf/hard of hearing                   |
| ELLA         | Early Language and Literacy Acquisition Study           |
| EOWPVT       | Expressive One Word Picture Vocabulary Test             |
| HA           | Hearing aid                                             |
| MLU          | Mean length of utterance                                |
| MSV          | Mental state verbs                                      |
| NDW          | Number of different words                               |
| PPVT         | Peabody Picture Vocabulary Test                         |
| PTONI        | Primary Test of Nonverbal Intelligence                  |
| SALT         | Systematic Analysis of Language Transcripts             |
| TEGI         | Test of Early Grammatical Impairment                    |
| TELD         | Test of Early Language Development                      |
| WLL          | Written Language Lab                                    |
