# Supplementary material
Source: publisher figshare collection journal article supplement (https://asha.figshare.com/articles/dataset/_/24091860)
Supplement: Supplementary file 2 [file 1]

## Supplemental Material S2. Complex syntax use.

| Variable             | DHH-CI<br>( <i>n</i> = 23)<br><i>M</i> ( <i>SD</i> ) | DHH-HA<br>( <i>n</i> = 22)<br><i>M</i> ( <i>SD</i> ) | CTH<br>( <i>n</i> = 28)<br><i>M</i> ( <i>SD</i> ) | <i>p</i>                                                                        |
|----------------------|------------------------------------------------------|------------------------------------------------------|---------------------------------------------------|---------------------------------------------------------------------------------|
| FPC Correct          | 0.83 (1.03)                                          | 0.55 (0.74)                                          | 2.50 (2.25)                                       | < .001<br><i>CTH-CI</i> : .003<br><i>CTH-HA</i> : < .001<br><i>CI-HA</i> : .654 |
| FPC Error            | 0.04 (0.21)                                          | 0.05 (0.21)                                          | 0.07 (0.26)                                       |                                                                                 |
| FPC Percent Correct  | 96.97 (10.04)                                        | 90.91 (30.15)                                        | 97.73 (7.79)                                      |                                                                                 |
| WFC Correct          | 0.26 (0.69)                                          | 0.77 (1.01)                                          | 1.29 (2.16)                                       | .061                                                                            |
| WFC Error            | 0.17 (0.39)                                          | 0.09 (0.43)                                          | 0.04 (0.19)                                       |                                                                                 |
| WFC Percent Correct  | 50 (53.45)                                           | 90.91 (30.15)                                        | 93.33 (25.82)                                     |                                                                                 |
| WNFC Correct         | 0.17 (0.65)                                          | 0.23 (0.53)                                          | 0.46 (1.26)                                       | .478                                                                            |
| WNFC Error           | < .001 (< .001)                                      | < .001 (< .001)                                      | < .001 (< .001)                                   |                                                                                 |
| WNFC Percent Correct | 100 (< .001)                                         | 100 (< .001)                                         | 100 (< .001)                                      |                                                                                 |

\**p* < .05.
