# Supplementary material
Source: publisher figshare collection journal article supplement (https://asha.figshare.com/articles/dataset/_/24091860)
Supplement: Supplementary file 3 [file 1]

**Supplemental Material S4.** MSV diversity by group and syntax type.

[illegible]
