# Supplementary material
Source: publisher figshare collection journal article supplement (https://asha.figshare.com/articles/dataset/_/24091860)
Supplement: Supplementary file 4 [file 1]

**Supplemental Material S3.** "I don't know" frequency and use of "know" without "I don't know."

| Variable                 | DHH-CI<br>( <i>n</i> = 23)<br><i>M</i> ( <i>SD</i> ) | DHH-HA<br>( <i>n</i> = 22)<br><i>M</i> ( <i>SD</i> ) | CTH<br>( <i>n</i> = 28)<br><i>M</i> ( <i>SD</i> ) | <i>p</i>                                                                           |
|--------------------------|------------------------------------------------------|------------------------------------------------------|---------------------------------------------------|------------------------------------------------------------------------------------|
| "I don't know" frequency | 2.91 (3.80)                                          | 3.00 (2.93)                                          | 1.21 (1.66)                                       | .047*<br><i>CTH-CI</i> : .158<br><i>CTH-HA</i> : .046*<br><i>CI-HA</i> : 1.00      |
| Know in Simple           | 0.22 (0.85)                                          | 0.91 (1.44)                                          | 1.29 (1.72)                                       | .031*<br><i>CTH-CI</i> : .018*<br><i>CTH-HA</i> : .789<br><i>CI-HA</i> : .169      |
| Total Know               | 0.78 (1.57)                                          | 2.09 (1.95)                                          | 2.93 (2.87)                                       | .005*<br><i>CTH-CI</i> : .004*<br><i>CTH-HA</i> : .536<br><i>CI-HA</i> : .052      |
| Total MSV                | 8.39 (7.51)                                          | 11.86 (7.87)                                         | 21.71 (9.91)                                      | <.001*<br><i>CTH-CI</i> : < .001*<br><i>CTH-HA</i> : .001*<br><i>CI-HA</i> : .359  |
| MSV in Simple            | 4.30 (4.05)                                          | 6.00 (4.71)                                          | 8.36 (4.52)                                       | .007*<br><i>CTH-CI</i> : .004*<br><i>CTH-HA</i> : .223<br><i>CI-HA</i> : .495      |
| MSV in FPC/WNFC/WFC      | 1.57 (2.11)                                          | 1.73 (2.07)                                          | 4.79 (4.50)                                       | .001*<br><i>CTH-CI</i> : .005*<br><i>CTH-HA</i> : .008*<br><i>CI-HA</i> : .992     |
| MSV in Other CS          | 2.57 (3.38)                                          | 4.14 (3.64)                                          | 8.57 (5.29)                                       | < .001*<br><i>CTH-CI</i> : < .001*<br><i>CTH-HA</i> : .003*<br><i>CI-HA</i> : .367 |

\**p* < .05
