# Supplementary material
Source: publisher figshare collection journal article supplement (https://asha.figshare.com/articles/dataset/_/24091860)
Supplement: Supplementary file 5 [file 1]

## Supplemental Material S1. Mental state verbs.

| <b>Mental state verb</b> | <b><i>FPC example</i></b>                                | <b><i>WFC example</i></b>                          | <b><i>WNFC example</i></b>                    |
|--------------------------|----------------------------------------------------------|----------------------------------------------------|-----------------------------------------------|
| Ask                      | He asked if I could go.                                  | He asked where I went.                             | He asked Mary where to go.                    |
| Believe                  | I believe that he is correct.                            | I believe what you are saying.                     | N/A                                           |
| Consider                 | I considered that she was right.                         | He considered what she was saying.                 | He considered what to say to her.             |
| Decide                   | He decided she was joking.                               | She decided whether he was lying.                  | He decided to go with her.                    |
| Discovered               | He discovered that the shell was actually a shark tooth. | He discovered where the sharks lived and hunted.   | He discovered who to search for at the beach. |
| Figure (out)             | I figure that she will grow up.                          | I figured out when she would return.               | I figured out when to leave tomorrow.         |
| Find                     | I found out that we went to school together.             | I found out where she goes to school.              | I found out where to go.                      |
| Finish                   | N/A                                                      | I finished what the sentence she was about to say. | N/A                                           |
| Forget*                  | I forgot that you were coming.                           | I forgot what you brought.                         | I forgot when to call you today.              |
| Guess*                   | The boy guessed that the movie would be scary.           | The girl guessed who stole the diamond ring.       | I guessed where to put the gift.              |
| Hate                     | I hate that she cancelled our plans.                     | I hate who she brought to the party.               | N/A                                           |
| Hear*                    | She heard that the team won the game.                    | He heard what they were talking about.             | She heard when to reserve her tickets.        |
| Hope                     | I hope that you come.                                    | N/A                                                | N/A                                           |
| Know*                    | Lily knows that you aren't coming.                       | He knows who bought the gift.                      | Lily knows who to send the letter to.         |
| Like*                    | I like that you came today.                              | I like who you brought to the party.               | N/A                                           |
| Look*                    |                                                          | Look what I did                                    |                                               |
| Love*                    | I love that you joined us.                               | She loves when you use that joke.                  | N/A                                           |

|             |                                                |                                                |                                                   |
|-------------|------------------------------------------------|------------------------------------------------|---------------------------------------------------|
| Mean*       | I mean that you are wrong.                     | N/A                                            | N/A                                               |
| Notice      | She noticed that he left early.                | I noticed what she was wearing.                | I noticed what she put in the bag.                |
| Prefer      | (I prefer that he left)                        | N/A                                            | N/A                                               |
| Pretend*    | Jake pretends that he went to school there.    | N/A                                            | Jake pretends where to go.                        |
| Promise     | She promised that she was honest.              | N/A                                            | N/A                                               |
| Remember*   | I remembered that you came to see me.          | He remembered where the baby dropped her doll. | He remembered where to meet on Monday.            |
| Realize     | She realized that she forgot her lunch.        | I realized where the class went.               | He realized how to solve the problem.             |
| Recognize   | I recognize that girl over there.              | She recognizes what she did was wrong.         | He recognized how to solve the puzzle.            |
| Remind      | My mom reminded me that I should say please.   | Zach reminded me who was coming to dinner.     | Nina reminded Alex what to say during the speech. |
| Say         | Megan says that he stole her seat.             | Bob said what she was doing last night.        | Molly said what to bring to the party.            |
| See*        | I see that you like animals.                   | He saw what you were doing.                    | She saw where to go.                              |
| Show        | She showed you that the fan was still working. | He showed the man where they were going.       | He showed him where to go.                        |
| Tell        | I told you that you were messy.                | He told her what they were doing.              | She told me what to do.                           |
| Think*      | I think that he forgot.                        | N/A                                            | (I think what to do)                              |
| Understand* | He understands that she can't go.              | She understands what they enjoy.               | He understands how to solve the problem.          |
| Watch       | She watched that they left on time.            | Molly watched what they played.                | Bill watched where to go.                         |
| Want*       | N/A                                            | I want what you described to me.               | N/A                                               |
| Wish        | I wish that you could come.                    | N/A                                            | N/A                                               |
| Wonder      | I wonder if they are coming.                   | I wonder where they went.                      | She wondered what to do.                          |

\*denotes verbs also listed in Bretherton and Beeghly (1982).
